# Supplementary material
Source: Springer Nature journal article supplement (https://www.springermedizin.de/resource/supplementary/12888_2013_1487_MOESM1_ESM.pdf/9480540)
Supplement: MOESM1 [file 9480540]

recruitment of patients waiting for inpatient psychotherapy

T<sub>0</sub>: baseline assessment (diagnostic interview)  
pre-intervention

exclude: acute psychosis, bipolar  
disorder, high suicidal risk

participants are randomised

TAU

GetOn-D + TAU

T<sub>1-2</sub>: weekly  
monitoring

T<sub>3</sub>: post-intervention  
primary outcome

T<sub>4</sub>: pre-inpatient therapy

T<sub>5-9</sub>: weekly monitoring during inpatient  
therapy

T<sub>10</sub>: post-inpatient therapy
